# Supplementary material
Source: MDPI journal article supplement (https://www.mdpi.com/2073-4433/14/2/330)
Supplement: s1 [file s1]

**Table S1.** Statistical parameters.

| Error estimator                             | Equation                                                                                                                                                                               |
|---------------------------------------------|----------------------------------------------------------------------------------------------------------------------------------------------------------------------------------------|
| coefficient of determination                | $R^2 = \left[ \frac{\sum_{i=1}^n (T_{O_i} - \bar{T}_O)(T_{P_i} - \bar{T}_P)}{\sqrt{\sum_{i=1}^n (T_{O_i} - \bar{T}_O)^2} \cdot \sqrt{\sum_{i=1}^n (T_{P_i} - \bar{T}_P)^2}} \right]^2$ |
| root mean square error                      | $RMSE = \sqrt{\frac{1}{n} \sum_{i=1}^n (T_{O_i} - T_{P_i})^2}$                                                                                                                         |
| normalized root mean square error           | $NRMSE = \frac{\sqrt{\frac{1}{n} \sum_{i=1}^n (T_{O_i} - T_{P_i})^2}}{T_{O_{max}} - T_{O_{min}}}$                                                                                      |
| Nash–Sutcliffe model efficiency coefficient | $NSE = 1 - \frac{\sum_{i=1}^n (T_{O_i} - T_{P_i})^2}{\sum_{i=1}^n (T_{O_i} - \bar{T}_O)^2}$                                                                                            |
| mean absolute percentage error              | $MAPE = \frac{100\%}{n} \sum_{i=1}^n \left  \frac{T_{O_i} - T_{P_i}}{T_{O_i}} \right $                                                                                                 |

$n$ —the number of observations,  $T_{O_i}$ —the observed value of temperature, °C, for  $i \in [1, n]$ ,  $\bar{T}_O$ —mean observed value of temperature, °C,  $T_{P_i}$ —the predicted value of temperature, °C, for  $i \in [1, n]$ ,  $\bar{T}_P$ —mean predicted value of temperature, °C,  $T_{O_{max}}$ —maximum observed value of temperature, °C,  $T_{O_{min}}$ —minimum observed value of temperature, °C.

**Table S2.** The results of trends analysis of air temperature for the period of 1984–2020.

| Period                         | S          | Tau          | Z-Value      | p-Value         | Sen's Slope  | S                 | Tau          | Z-Value      | p-Value         | Sen's Slope  |
|--------------------------------|------------|--------------|--------------|-----------------|--------------|-------------------|--------------|--------------|-----------------|--------------|
| <b>Gorzów Wielkopolski (1)</b> |            |              |              |                 |              | <b>Piła (2)</b>   |              |              |                 |              |
| <b>Nov</b>                     | <b>206</b> | <b>0.327</b> | <b>2.792</b> | <b>0.0052**</b> | <b>0.076</b> | <b>210</b>        | <b>0.333</b> | <b>2.847</b> | <b>0.0044**</b> | <b>0.078</b> |
| Dec                            | 118        | 0.187        | 1.594        | 0.1110          | 0.060        | 110               | 0.175        | 1.485        | 0.1376          | 0.051        |
| Jan                            | 10         | 0.016        | 0.123        | 0.9024          | 0.009        | 10                | 0.016        | 0.123        | 0.9024          | 0.009        |
| Feb                            | 72         | 0.114        | 0.967        | 0.3335          | 0.049        | 72                | 0.114        | 0.967        | 0.3335          | 0.047        |
| Mar                            | 94         | 0.149        | 1.267        | 0.2052          | 0.038        | 96                | 0.152        | 1.294        | 0.1957          | 0.049        |
| <b>Apr</b>                     | <b>246</b> | <b>0.390</b> | <b>3.337</b> | <b>0.0008**</b> | <b>0.067</b> | <b>212</b>        | <b>0.337</b> | <b>2.874</b> | <b>0.0041**</b> | <b>0.059</b> |
| May                            | 14         | 0.022        | 0.177        | 0.8595          | 0.003        | 12                | 0.019        | 0.150        | 0.8809          | 0.004        |
| <b>Jun</b>                     | <b>252</b> | <b>0.400</b> | <b>3.419</b> | <b>0.0006**</b> | <b>0.089</b> | <b>262</b>        | <b>0.416</b> | <b>3.555</b> | <b>0.0004**</b> | <b>0.083</b> |
| Jul                            | 138        | 0.219        | 1.866        | 0.0620          | 0.042        | 126               | 0.200        | 1.703        | 0.0886          | 0.051        |
| <b>Aug</b>                     | <b>186</b> | <b>0.295</b> | <b>2.520</b> | <b>0.0117*</b>  | <b>0.061</b> | <b>200</b>        | <b>0.317</b> | <b>2.711</b> | <b>0.0067**</b> | <b>0.070</b> |
| <b>Sep</b>                     | <b>196</b> | <b>0.311</b> | <b>2.656</b> | <b>0.0079**</b> | <b>0.060</b> | <b>194</b>        | <b>0.308</b> | <b>2.629</b> | <b>0.0086**</b> | <b>0.057</b> |
| Oct                            | 82         | 0.130        | 1.103        | 0.2699          | 0.038        | 84                | 0.133        | 1.131        | 0.2583          | 0.041        |
| <b>Year</b>                    | <b>234</b> | <b>0.371</b> | <b>3.174</b> | <b>0.0015**</b> | <b>0.049</b> | <b>218</b>        | <b>0.346</b> | <b>2.956</b> | <b>0.0031**</b> | <b>0.050</b> |
| <b>Słubice (3)</b>             |            |              |              |                 |              | <b>Leszno (4)</b> |              |              |                 |              |
| <b>Nov</b>                     | <b>180</b> | <b>0.286</b> | <b>2.438</b> | <b>0.0148*</b>  | <b>0.067</b> | <b>232</b>        | <b>0.368</b> | <b>3.146</b> | <b>0.0017**</b> | <b>0.088</b> |
| Dec                            | 98         | 0.156        | 1.321        | 0.1864          | 0.047        | 98                | 0.156        | 1.321        | 0.1864          | 0.053        |
| Jan                            | 24         | 0.038        | 0.313        | 0.7541          | 0.017        | 22                | 0.035        | 0.286        | 0.7748          | 0.015        |
| Feb                            | 76         | 0.121        | 1.022        | 0.3070          | 0.055        | 72                | 0.114        | 0.967        | 0.3335          | 0.046        |
| Mar                            | 82         | 0.130        | 1.103        | 0.2699          | 0.042        | 77                | 0.122        | 1.035        | 0.3005          | 0.039        |
| <b>Apr</b>                     | <b>228</b> | <b>0.362</b> | <b>3.092</b> | <b>0.0020**</b> | <b>0.067</b> | <b>202</b>        | <b>0.321</b> | <b>2.738</b> | <b>0.0062**</b> | <b>0.051</b> |
| May                            | 8          | 0.013        | 0.095        | 0.9240          | 0.002        | −26               | −0.041       | −0.341       | 0.7335          | −0.017       |

|                        |            |              |                |                 |                            |            |              |                |                 |                    |
|------------------------|------------|--------------|----------------|-----------------|----------------------------|------------|--------------|----------------|-----------------|--------------------|
|                        |            |              |                |                 |                            |            |              |                |                 |                    |
| <b>Jun</b>             | <b>276</b> | <b>0.438</b> | <b>3.746</b>   | <b>0.0002**</b> | <b>0.083</b>               | <b>270</b> | <b>0.429</b> | <b>3.664</b>   | <b>0.0002**</b> | <b>0.083</b>       |
| Jul                    | 166        | 0.263        | 2.247          | 0.0246*         | 0.050                      | 172        | 0.273        | 2.329          | 0.0198*         | 0.054              |
| <b>Aug</b>             | <b>236</b> | <b>0.375</b> | <b>3.201</b>   | <b>0.0014**</b> | <b>0.077</b>               | <b>236</b> | <b>0.375</b> | <b>3.201</b>   | <b>0.0014**</b> | <b>0.072</b>       |
| <b>Sep</b>             | <b>200</b> | <b>0.317</b> | <b>2.711</b>   | <b>0.0067**</b> | <b>0.061</b>               | <b>182</b> | <b>0.289</b> | <b>2.465</b>   | <b>0.0137*</b>  | <b>0.054</b>       |
| Oct                    | 112        | 0.178        | 1.512          | 0.1306          | 0.047                      | 114        | 0.181        | 1.539          | 0.1238          | 0.046              |
| <b>Year</b>            | <b>238</b> | <b>0.378</b> | <b>3.228</b>   | <b>0.0012**</b> | <b>0.055</b>               | <b>222</b> | <b>0.352</b> | <b>3.010</b>   | <b>0.0026**</b> | <b>0.051</b>       |
| <b>Wielichowo (5)</b>  |            |              |                |                 | <b>Zielona Góra (6)</b>    |            |              |                |                 |                    |
| <b>Nov</b>             | <b>222</b> | <b>0.352</b> | <b>3.010</b>   | <b>0.0026**</b> | <b>0.075</b>               | <b>222</b> | <b>0.352</b> | <b>3.010</b>   | <b>0.0026**</b> | <b>0.073</b>       |
| Dec                    | 102        | 0.162        | 1.376          | 0.1689          | 0.050                      | 116        | 0.184        | 1.566          | 0.1173          | 0.050              |
| Jan                    | 16         | 0.025        | 0.204          | 0.8381          | 0.010                      | 20         | 0.032        | 0.259          | 0.7958          | 0.015              |
| Feb                    | 66         | 0.105        | 0.885          | 0.3760          | 0.043                      | 78         | 0.124        | 1.049          | 0.2943          | 0.053              |
| Mar                    | 90         | 0.143        | 1.212          | 0.2254          | 0.047                      | 104        | 0.165        | 1.403          | 0.1606          | 0.054              |
| <b>Apr</b>             | <b>224</b> | <b>0.356</b> | <b>3.037</b>   | <b>0.0024**</b> | <b>0.051</b>               | <b>238</b> | <b>0.378</b> | <b>3.228</b>   | <b>0.0012**</b> | <b>0.076</b>       |
| May                    | -19        | -0.030       | -0.245         | 0.8063          | -0.010                     | -3         | -0.005       | -0.027         | 0.9783          | -0.002             |
| <b>Jun</b>             | <b>248</b> | <b>0.394</b> | <b>3.364</b>   | <b>0.0008**</b> | <b>0.075</b>               | <b>264</b> | <b>0.419</b> | <b>3.582</b>   | <b>0.0003**</b> | <b>0.094</b>       |
| Jul                    | 152        | 0.241        | 2.057          | 0.0397*         | 0.055                      | 132        | 0.210        | 1.784          | 0.0744          | 0.052              |
| <b>Aug</b>             | <b>218</b> | <b>0.346</b> | <b>2.956</b>   | <b>0.0031**</b> | <b>0.069</b>               | <b>174</b> | <b>0.276</b> | <b>2.356</b>   | <b>0.0185*</b>  | <b>0.070</b>       |
| <b>Sep</b>             | <b>160</b> | <b>0.254</b> | <b>2.166</b>   | <b>0.0303*</b>  | <b>0.049</b>               | <b>178</b> | <b>0.283</b> | <b>2.411</b>   | <b>0.0159*</b>  | <b>0.069</b>       |
| Oct                    | 94         | 0.149        | 1.267          | 0.2052          | 0.041                      | 78         | 0.124        | 1.049          | 0.2943          | 0.034              |
| <b>Year</b>            | <b>230</b> | <b>0.365</b> | <b>3.119</b>   | <b>0.0018**</b> | <b>0.052</b>               | <b>228</b> | <b>0.362</b> | <b>3.092</b>   | <b>0.0020**</b> | <b>0.050</b>       |
| <b>Period</b>          | <b>S</b>   | <b>Tau</b>   | <b>Z-Value</b> | <b>p-Value</b>  | <b>Sen's Slope</b>         | <b>S</b>   | <b>Tau</b>   | <b>Z-Value</b> | <b>p-Value</b>  | <b>Sen's Slope</b> |
| <b>Chrzastkowo (7)</b> |            |              |                |                 | <b>Poznań – Ławica (8)</b> |            |              |                |                 |                    |
| <b>Nov</b>             | <b>200</b> | <b>0.317</b> | <b>2.711</b>   | <b>0.0067**</b> | <b>0.071</b>               | <b>240</b> | <b>0.381</b> | <b>3.255</b>   | <b>0.0011**</b> | <b>0.085</b>       |
| Dec                    | 108        | 0.171        | 1.457          | 0.1450          | 0.042                      | 108        | 0.171        | 1.457          | 0.1450          | 0.054              |
| Jan                    | 0          | 0.000        | 0.000          | 1.0000          | 0.000                      | 12         | 0.019        | 0.150          | 0.8809          | 0.009              |
| Feb                    | 60         | 0.095        | 0.804          | 0.4216          | 0.039                      | 76         | 0.121        | 1.022          | 0.3070          | 0.049              |
| Mar                    | 92         | 0.146        | 1.240          | 0.2152          | 0.046                      | 90         | 0.143        | 1.212          | 0.2254          | 0.048              |
| <b>Apr</b>             | <b>202</b> | <b>0.321</b> | <b>2.738</b>   | <b>0.0062**</b> | <b>0.051</b>               | <b>238</b> | <b>0.378</b> | <b>3.228</b>   | <b>0.0012**</b> | <b>0.065</b>       |
| May                    | 10         | 0.016        | 0.123          | 0.9024          | 0.002                      | 24         | 0.038        | 0.313          | 0.7541          | 0.008              |
| <b>Jun</b>             | <b>238</b> | <b>0.378</b> | <b>3.228</b>   | <b>0.0012**</b> | <b>0.071</b>               | <b>306</b> | <b>0.486</b> | <b>4.154</b>   | <b>0.0000**</b> | <b>0.104</b>       |
| Jul                    | 142        | 0.225        | 1.921          | 0.0548          | 0.047                      | 178        | 0.283        | 2.411          | 0.0159*         | 0.062              |
| <b>Aug</b>             | <b>198</b> | <b>0.314</b> | <b>2.683</b>   | <b>0.0073**</b> | <b>0.063</b>               | <b>280</b> | <b>0.444</b> | <b>3.800</b>   | <b>0.0001**</b> | <b>0.092</b>       |
| <b>Sep</b>             | <b>189</b> | <b>0.300</b> | <b>2.561</b>   | <b>0.0104*</b>  | <b>0.058</b>               | <b>234</b> | <b>0.371</b> | <b>3.174</b>   | <b>0.0015**</b> | <b>0.075</b>       |
| Oct                    | 70         | 0.111        | 0.940          | 0.3473          | 0.038                      | 100        | 0.159        | 1.348          | 0.1775          | 0.051              |
| <b>Year</b>            | <b>204</b> | <b>0.324</b> | <b>2.765</b>   | <b>0.0057**</b> | <b>0.044</b>               | <b>274</b> | <b>0.435</b> | <b>3.719</b>   | <b>0.0002**</b> | <b>0.061</b>       |
| <b>Kalisz (9)</b>      |            |              |                |                 | <b>Koło (10)</b>           |            |              |                |                 |                    |
| <b>Nov</b>             | <b>242</b> | <b>0.384</b> | <b>3.283</b>   | <b>0.0010**</b> | <b>0.092</b>               | <b>228</b> | <b>0.362</b> | <b>3.092</b>   | <b>0.0020**</b> | <b>0.081</b>       |
| Dec                    | 118        | 0.187        | 1.594          | 0.1110          | 0.056                      | 124        | 0.197        | 1.675          | 0.0939          | 0.059              |
| Jan                    | -6         | -0.010       | -0.068         | 0.9457          | -0.003                     | 2          | 0.003        | 0.014          | 0.9891          | 0.001              |
| Feb                    | 58         | 0.092        | 0.776          | 0.4375          | 0.047                      | 50         | 0.079        | 0.667          | 0.5045          | 0.046              |
| Mar                    | 110        | 0.175        | 1.485          | 0.1376          | 0.058                      | 120        | 0.190        | 1.621          | 0.1050          | 0.068              |
| <b>Apr</b>             | <b>212</b> | <b>0.337</b> | <b>2.874</b>   | <b>0.0041**</b> | <b>0.059</b>               | <b>220</b> | <b>0.349</b> | <b>2.983</b>   | <b>0.0029**</b> | <b>0.062</b>       |
| May                    | -2         | -0.003       | -0.014         | 0.9891          | 0.000                      | -16        | -0.025       | -0.204         | 0.8381          | -0.006             |
| <b>Jun</b>             | <b>274</b> | <b>0.435</b> | <b>3.719</b>   | <b>0.0002**</b> | <b>0.090</b>               | <b>276</b> | <b>0.438</b> | <b>3.746</b>   | <b>0.0002**</b> | <b>0.079</b>       |
| Jul                    | 162        | 0.257        | 2.193          | 0.0283*         | 0.058                      | 154        | 0.244        | 2.084          | 0.0372*         | 0.054              |
| <b>Aug</b>             | <b>252</b> | <b>0.400</b> | <b>3.419</b>   | <b>0.0006**</b> | <b>0.075</b>               | <b>268</b> | <b>0.425</b> | <b>3.637</b>   | <b>0.0003**</b> | <b>0.071</b>       |
| <b>Sep</b>             | <b>196</b> | <b>0.311</b> | <b>2.656</b>   | <b>0.0079**</b> | <b>0.066</b>               | <b>208</b> | <b>0.330</b> | <b>2.820</b>   | <b>0.0048**</b> | <b>0.069</b>       |
| Oct                    | 88         | 0.140        | 1.185          | 0.2360          | 0.041                      | 94         | 0.149        | 1.267          | 0.2052          | 0.048              |
| <b>Year</b>            | <b>236</b> | <b>0.375</b> | <b>3.201</b>   | <b>0.0014**</b> | <b>0.051</b>               | <b>244</b> | <b>0.387</b> | <b>3.310</b>   | <b>0.0009**</b> | <b>0.051</b>       |

| Łódź – Lublinek (11) |     |        |         |          |             | Sulejów (12)     |        |         |          |             |
|----------------------|-----|--------|---------|----------|-------------|------------------|--------|---------|----------|-------------|
| Nov                  | 224 | 0.356  | 3.037   | 0.0024** | 0.089       | 204              | 0.324  | 2.765   | 0.0057** | 0.085       |
| Dec                  | 136 | 0.216  | 1.839   | 0.0659   | 0.066       | 136              | 0.216  | 1.839   | 0.0659   | 0.059       |
| Jan                  | −4  | −0.006 | −0.041  | 0.9674   | −0.001      | 1                | 0.002  | 0.000   | 1.0000   | 0.000       |
| Feb                  | 64  | 0.102  | 0.858   | 0.3908   | 0.049       | 60               | 0.095  | 0.804   | 0.4216   | 0.039       |
| Mar                  | 108 | 0.171  | 1.457   | 0.1450   | 0.065       | 124              | 0.197  | 1.675   | 0.0939   | 0.059       |
| Apr                  | 150 | 0.238  | 2.030   | 0.0424*  | 0.048       | 192              | 0.305  | 2.602   | 0.0093** | 0.056       |
| May                  | −36 | −0.057 | −0.477  | 0.6336   | −0.013      | −2               | −0.003 | −0.014  | 0.9891   | −0.001      |
| Jun                  | 272 | 0.432  | 3.691   | 0.0002** | 0.077       | 280              | 0.444  | 3.800   | 0.0001** | 0.081       |
| Jul                  | 114 | 0.181  | 1.539   | 0.1238   | 0.048       | 158              | 0.251  | 2.138   | 0.0325*  | 0.057       |
| Aug                  | 240 | 0.381  | 3.255   | 0.0011** | 0.065       | 298              | 0.473  | 4.045   | 0.0001** | 0.074       |
| Sep                  | 178 | 0.283  | 2.411   | 0.0159*  | 0.059       | 200              | 0.317  | 2.711   | 0.0067** | 0.066       |
| Oct                  | 76  | 0.121  | 1.022   | 0.3070   | 0.033       | 96               | 0.152  | 1.294   | 0.1957   | 0.040       |
| Year                 | 214 | 0.340  | 2.901   | 0.0037** | 0.049       | 278              | 0.441  | 3.773   | 0.0002** | 0.052       |
| Period               | S   | Tau    | Z-Value | p-Value  | Sen's Slope | S                | Tau    | Z-Value | p-Value  | Sen's Slope |
| Wieluń (13)          |     |        |         |          |             | Lgota Górna (14) |        |         |          |             |
| Nov                  | 214 | 0.340  | 2.901   | 0.0037** | 0.094       | 204              | 0.324  | 2.765   | 0.0057** | 0.094       |
| Dec                  | 122 | 0.194  | 1.648   | 0.0993   | 0.058       | 140              | 0.222  | 1.893   | 0.0583   | 0.070       |
| Jan                  | −2  | −0.003 | −0.014  | 0.9891   | −0.002      | 22               | 0.035  | 0.286   | 0.7748   | 0.016       |
| Feb                  | 74  | 0.117  | 0.994   | 0.3201   | 0.056       | 88               | 0.140  | 1.185   | 0.2360   | 0.072       |
| Mar                  | 122 | 0.194  | 1.648   | 0.0993   | 0.063       | 90               | 0.143  | 1.212   | 0.2254   | 0.052       |
| Apr                  | 212 | 0.337  | 2.874   | 0.0041** | 0.062       | 186              | 0.295  | 2.520   | 0.0117*  | 0.050       |
| May                  | −34 | −0.054 | −0.449  | 0.6531   | −0.007      | −33              | −0.052 | −0.436  | 0.6629   | −0.010      |
| Jun                  | 294 | 0.467  | 3.991   | 0.0001** | 0.082       | 250              | 0.397  | 3.392   | 0.0007** | 0.076       |
| Jul                  | 154 | 0.244  | 2.084   | 0.0372*  | 0.056       | 122              | 0.194  | 1.648   | 0.0993   | 0.043       |
| Aug                  | 272 | 0.432  | 3.691   | 0.0002** | 0.079       | 250              | 0.397  | 3.392   | 0.0007** | 0.068       |
| Sep                  | 180 | 0.286  | 2.438   | 0.0148*  | 0.063       | 164              | 0.260  | 2.220   | 0.0264*  | 0.048       |
| Oct                  | 76  | 0.121  | 1.022   | 0.3070   | 0.043       | 82               | 0.130  | 1.103   | 0.2699   | 0.035       |
| Year                 | 258 | 0.410  | 3.501   | 0.0005** | 0.057       | 248              | 0.394  | 3.364   | 0.0008** | 0.047       |
| Końuda Wielka (15)   |     |        |         |          |             | Toruń (16)       |        |         |          |             |
| Nov                  | 222 | 0.352  | 3.010   | 0.0026** | 0.076       | 204              | 0.324  | 2.765   | 0.0057** | 0.08        |
| Dec                  | 118 | 0.187  | 1.594   | 0.1110   | 0.053       | 122              | 0.194  | 1.648   | 0.0993   | 0.059       |
| Jan                  | 2   | 0.003  | 0.014   | 0.9891   | 0.001       | 20               | 0.032  | 0.259   | 0.7958   | 0.012       |
| Feb                  | 58  | 0.092  | 0.776   | 0.4375   | 0.045       | 56               | 0.089  | 0.749   | 0.4538   | 0.042       |
| Mar                  | 114 | 0.181  | 1.539   | 0.1238   | 0.062       | 118              | 0.187  | 1.594   | 0.1110   | 0.062       |
| Apr                  | 186 | 0.295  | 2.520   | 0.0117*  | 0.044       | 196              | 0.311  | 2.656   | 0.0079** | 0.052       |
| May                  | −6  | −0.010 | −0.068  | 0.9457   | −0.003      | 38               | 0.060  | 0.504   | 0.6143   | 0.012       |
| Jun                  | 246 | 0.390  | 3.337   | 0.0008** | 0.074       | 252              | 0.400  | 3.419   | 0.0006** | 0.075       |
| Jul                  | 124 | 0.197  | 1.675   | 0.0939   | 0.041       | 136              | 0.216  | 1.839   | 0.0659   | 0.04        |
| Aug                  | 156 | 0.248  | 2.111   | 0.0348*  | 0.047       | 194              | 0.308  | 2.629   | 0.0086** | 0.061       |
| Sep                  | 126 | 0.200  | 1.703   | 0.0886   | 0.041       | 206              | 0.327  | 2.792   | 0.0052** | 0.062       |
| Oct                  | 82  | 0.130  | 1.103   | 0.2699   | 0.033       | 88               | 0.140  | 1.185   | 0.2360   | 0.046       |
| Year                 | 186 | 0.295  | 2.520   | 0.0117*  | 0.043       | 214              | 0.340  | 2.901   | 0.0037** | 0.049       |

\*—significant at a level of 0.05; \*\*—significant at a level of 0.01.

Table S3. The results of trends analysis of river water temperature for the period of 1984–2020.

| Period                          | S   | Tau    | Z-Value | p-Value  | Sen's Slope | S                  | Tau    | Z-Value | p-Value  | Sen's Slope |
|---------------------------------|-----|--------|---------|----------|-------------|--------------------|--------|---------|----------|-------------|
| Warta – Gorzów Wielkopolski (a) |     |        |         |          |             | Obra – Zbąszyń (b) |        |         |          |             |
| Nov                             | 194 | 0.308  | 2.629   | 0.0086** | 0.049       | 326                | 0.5170 | 4.427   | 0.0000** | 0.080       |
| Dec                             | 156 | 0.248  | 2.111   | 0.0348*  | 0.036       | 226                | 0.3590 | 3.065   | 0.0022** | 0.049       |
| Jan                             | 54  | 0.086  | 0.722   | 0.4704   | 0.015       | 92                 | 0.1460 | 1.24    | 0.2152   | 0.021       |
| Feb                             | 62  | 0.098  | 0.831   | 0.4060   | 0.015       | 90                 | 0.1430 | 1.212   | 0.2254   | 0.031       |
| Mar                             | 86  | 0.137  | 1.158   | 0.2470   | 0.040       | 148                | 0.2350 | 2.002   | 0.0453*  | 0.047       |
| Apr                             | 158 | 0.251  | 2.138   | 0.0325*  | 0.046       | 214                | 0.3400 | 2.901   | 0.0037** | 0.054       |
| May                             | 88  | 0.140  | 1.185   | 0.2360   | 0.030       | 28                 | 0.0440 | 0.368   | 0.7130   | 0.009       |
| Jun                             | 256 | 0.406  | 3.473   | 0.0005** | 0.076       | 226                | 0.3590 | 3.065   | 0.0022** | 0.071       |
| Jul                             | 176 | 0.279  | 2.384   | 0.0171*  | 0.049       | 166                | 0.2630 | 2.247   | 0.0246*  | 0.044       |
| Aug                             | 258 | 0.410  | 3.501   | 0.0005** | 0.071       | 298                | 0.4730 | 4.045   | 0.0001** | 0.082       |
| Sep                             | 282 | 0.448  | 3.827   | 0.0001** | 0.067       | 238                | 0.3780 | 3.228   | 0.0012*  | 0.063       |
| Oct                             | 138 | 0.219  | 1.866   | 0.0620   | 0.038       | 120                | 0.1900 | 1.621   | 0.1050   | 0.035       |
| Year                            | 300 | 0.476  | 4.073   | 0.0000** | 0.043       | 384                | 0.6100 | 5.217   | 0.0000** | 0.050       |
| Gwda – Piła (c)                 |     |        |         |          |             | Warta – Śrem (d)   |        |         |          |             |
| Nov                             | 188 | 2.547  | 2.547   | 0.0109*  | 0.044       | 278                | 0.441  | 3.773   | 0.0002** | 0.085       |
| Dec                             | 88  | 1.185  | 1.185   | 0.2360   | 0.022       | 216                | 0.343  | 2.928   | 0.0034** | 0.044       |
| Jan                             | –6  | –0.068 | –0.068  | 0.9457   | –0.001      | 36                 | 0.057  | 0.477   | 0.6336   | 0.006       |
| Feb                             | 24  | 0.313  | 0.313   | 0.7541   | 0.008       | 100                | 0.159  | 1.348   | 0.1775   | 0.029       |
| Mar                             | 80  | 1.076  | 1.076   | 0.2819   | 0.026       | 122                | 0.194  | 1.648   | 0.0993   | 0.044       |
| Apr                             | 188 | 2.547  | 2.547   | 0.0109*  | 0.048       | 220                | 0.349  | 2.983   | 0.0029** | 0.073       |
| May                             | 42  | 0.558  | 0.558   | 0.5765   | 0.011       | 22                 | 0.035  | 0.286   | 0.7748   | 0.007       |
| Jun                             | 256 | 3.473  | 3.473   | 0.0005** | 0.063       | 292                | 0.463  | 3.964   | 0.0001** | 0.083       |
| Jul                             | 154 | 2.084  | 2.084   | 0.0372*  | 0.040       | 162                | 0.257  | 2.193   | 0.0283*  | 0.048       |
| Aug                             | 246 | 3.337  | 3.337   | 0.0008** | 0.055       | 314                | 0.498  | 4.263   | 0.0000** | 0.064       |
| Sep                             | 280 | 3.800  | 3.800   | 0.0001** | 0.053       | 270                | 0.429  | 3.664   | 0.0002** | 0.086       |
| Oct                             | 74  | 0.994  | 0.994   | 0.3201   | 0.019       | 176                | 0.279  | 2.384   | 0.0171*  | 0.053       |
| Year                            | 292 | 3.964  | 3.964   | 0.0001** | 0.030       | 382                | 0.606  | 5.190   | 0.0000   | 0.054       |
| Prosna – Bogusław (e)           |     |        |         |          |             | Ner – Dąbie (f)    |        |         |          |             |
| Nov                             | 230 | 0.365  | 3.119   | 0.0018** | 0.066       | 58                 | 0.092  | 0.776   | 0.4375   | 0.020       |
| Dec                             | 166 | 0.263  | 2.247   | 0.0246*  | 0.041       | 56                 | 0.089  | 0.749   | 0.4538   | 0.013       |
| Jan                             | 28  | 0.044  | 0.368   | 0.7130   | 0.009       | –22                | –0.035 | –0.286  | 0.7748   | –0.009      |
| Feb                             | 76  | 0.121  | 1.022   | 0.3070   | 0.022       | 18                 | 0.029  | 0.232   | 0.8169   | 0.004       |
| Mar                             | 126 | 0.200  | 1.703   | 0.0886   | 0.050       | –10                | –0.016 | –0.123  | 0.9024   | –0.003      |
| Apr                             | 192 | 0.305  | 2.602   | 0.0093** | 0.050       | 12                 | 0.019  | 0.15    | 0.8809   | 0.002       |
| May                             | 34  | 0.054  | 0.449   | 0.6531   | 0.008       | –50                | –0.079 | –0.667  | 0.5045   | –0.013      |
| Jun                             | 286 | 0.454  | 3.882   | 0.0001** | 0.064       | 144                | 0.229  | 1.948   | 0.0514   | 0.037       |
| Jul                             | 172 | 0.273  | 2.329   | 0.0198*  | 0.044       | 76                 | 0.121  | 1.022   | 0.3070   | 0.022       |
| Aug                             | 306 | 0.486  | 4.154   | 0.0000** | 0.047       | 140                | 0.222  | 1.893   | 0.0583   | 0.034       |
| Sep                             | 220 | 0.349  | 2.983   | 0.0029** | 0.051       | 134                | 0.213  | 1.812   | 0.0701   | 0.031       |
| Oct                             | 144 | 0.229  | 1.948   | 0.0514   | 0.038       | 15                 | 0.024  | 0.191   | 0.8488   | 0.003       |
| Year                            | 306 | 0.486  | 4.154   | 0.0000** | 0.040       | 92                 | 0.146  | 1.24    | 0.2152   | 0.010       |
| Widawka – Szczerców (g)         |     |        |         |          |             | Warta – Bobry (h)  |        |         |          |             |
| Nov                             | 276 | 0.438  | 3.746   | 0.0002** | 0.061       | 174                | 0.276  | 2.356   | 0.0185*  | 0.047       |
| Dec                             | 212 | 0.337  | 2.874   | 0.0041** | 0.039       | 85                 | 0.135  | 1.144   | 0.2525   | 0.022       |
| Jan                             | 80  | 0.127  | 1.076   | 0.2819   | 0.020       | –12                | –0.019 | –0.150  | 0.8809   | –0.005      |
| Feb                             | 107 | 0.170  | 1.444   | 0.1488   | 0.026       | 62                 | 0.098  | 0.831   | 0.4060   | 0.020       |

|                                |            |              |              |                 |              |                                   |              |              |                 |              |
|--------------------------------|------------|--------------|--------------|-----------------|--------------|-----------------------------------|--------------|--------------|-----------------|--------------|
| Mar                            | 126        | 0.200        | 1.703        | 0.0886          | 0.028        | 68                                | 0.108        | 0.913        | 0.3615          | 0.020        |
| <b>Apr</b>                     | <b>194</b> | <b>0.308</b> | <b>2.629</b> | <b>0.0086**</b> | <b>0.044</b> | 74                                | 0.117        | 0.994        | 0.3201          | 0.015        |
| May                            | 78         | 0.124        | 1.049        | 0.2943          | 0.017        | -72                               | -0.114       | -0.967       | 0.3335          | -0.015       |
| <b>Jun</b>                     | <b>198</b> | <b>0.314</b> | <b>2.683</b> | <b>0.0073**</b> | <b>0.038</b> | <b>148</b>                        | <b>0.235</b> | <b>2.002</b> | <b>0.0453*</b>  | <b>0.037</b> |
| Jul                            | 116        | 0.184        | 1.566        | 0.1173          | 0.022        | 42                                | 0.067        | 0.558        | 0.5765          | 0.006        |
| <b>Aug</b>                     | <b>212</b> | <b>0.337</b> | <b>2.874</b> | <b>0.0041**</b> | <b>0.029</b> | 71                                | 0.113        | 0.954        | 0.3402          | 0.013        |
| <b>Sep</b>                     | <b>224</b> | <b>0.356</b> | <b>3.037</b> | <b>0.0024**</b> | <b>0.040</b> | 66                                | 0.105        | 0.885        | 0.3760          | 0.012        |
| Oct                            | <b>156</b> | <b>0.248</b> | <b>2.111</b> | <b>0.0348*</b>  | <b>0.038</b> | 38                                | 0.060        | 0.504        | 0.6143          | 0.012        |
| <b>Year</b>                    | <b>330</b> | <b>0.524</b> | <b>4.481</b> | <b>0.0000**</b> | <b>0.030</b> | <b>152</b>                        | <b>0.241</b> | <b>2.057</b> | <b>0.0397*</b>  | <b>0.016</b> |
| <b>Mała Noteć – Gębice (i)</b> |            |              |              |                 |              | <b>Noteć – Nowe Dreżdenko (j)</b> |              |              |                 |              |
| Nov                            | 114        | 0.181        | 1.539        | 0.1238          | 0.039        | <b>236</b>                        | <b>0.375</b> | <b>3.201</b> | <b>0.0014**</b> | <b>0.059</b> |
| <b>Dec</b>                     | <b>176</b> | <b>0.279</b> | <b>2.384</b> | <b>0.0171*</b>  | <b>0.048</b> | <b>150</b>                        | <b>0.238</b> | <b>2.03</b>  | <b>0.0424*</b>  | <b>0.035</b> |
| Jan                            | 45         | 0.071        | 0.599        | 0.5489          | 0.013        | 70                                | 0.111        | 0.94         | 0.3473          | 0.02         |
| Feb                            | 104        | 0.165        | 1.403        | 0.1606          | 0.035        | 46                                | 0.073        | 0.613        | 0.5399          | 0.012        |
| Mar                            | 144        | 0.229        | 1.948        | 0.0514          | 0.060        | 78                                | 0.124        | 1.049        | 0.2943          | 0.028        |
| <b>Apr</b>                     | <b>160</b> | <b>0.254</b> | <b>2.166</b> | <b>0.0303*</b>  | <b>0.055</b> | <b>222</b>                        | <b>0.352</b> | <b>3.01</b>  | <b>0.0026**</b> | <b>0.058</b> |
| May                            | -18        | -0.029       | -0.232       | 0.8169          | -0.006       | 74                                | 0.117        | 0.994        | 0.3201          | 0.022        |
| <b>Jun</b>                     | <b>198</b> | <b>0.314</b> | <b>2.683</b> | <b>0.0073**</b> | <b>0.074</b> | <b>250</b>                        | <b>0.397</b> | <b>3.392</b> | <b>0.0007**</b> | <b>0.064</b> |
| Jul                            | 8          | 0.013        | 0.095        | 0.9240          | 0.004        | <b>155</b>                        | <b>0.246</b> | <b>2.098</b> | <b>0.0359*</b>  | <b>0.03</b>  |
| Aug                            | 118        | 0.187        | 1.594        | 0.1110          | 0.033        | <b>188</b>                        | <b>0.298</b> | <b>2.547</b> | <b>0.0109*</b>  | <b>0.044</b> |
| Sep                            | 26         | 0.041        | 0.341        | 0.7335          | 0.005        | <b>268</b>                        | <b>0.425</b> | <b>3.637</b> | <b>0.0003**</b> | <b>0.056</b> |
| Oct                            | -8         | -0.013       | -0.095       | 0.9240          | -0.003       | <b>192</b>                        | <b>0.305</b> | <b>2.602</b> | <b>0.0093**</b> | <b>0.044</b> |
| <b>Year</b>                    | <b>182</b> | <b>0.289</b> | <b>2.465</b> | <b>0.0137*</b>  | <b>0.036</b> | <b>282</b>                        | <b>0.448</b> | <b>3.827</b> | <b>0.0001**</b> | <b>0.039</b> |

\*—significant at a level of 0.05; \*\*—significant at a level of 0.01.

**Table S4.** The results of trends analysis of lake water temperature for the period of 1984–2020.

| Period                                  | S          | Tau          | Z-Value      | P-Value         | Sen's Slope  |
|-----------------------------------------|------------|--------------|--------------|-----------------|--------------|
| <b>jez. Bytyń Wielki – Nakielno (I)</b> |            |              |              |                 |              |
| <b>Nov</b>                              | <b>253</b> | <b>0.402</b> | <b>3.433</b> | <b>0.0006**</b> | <b>0.060</b> |
| Dec                                     | 56         | 0.089        | 0.749        | 0.4538          | 0.012        |
| Jan                                     | 94         | 0.149        | 1.267        | 0.2052          | 0.014        |
| Feb                                     | -7         | -0.011       | -0.082       | 0.9348          | -0.001       |
| Mar                                     | 50         | 0.079        | 0.667        | 0.5045          | 0.015        |
| <b>Apr</b>                              | <b>178</b> | <b>0.283</b> | <b>2.411</b> | <b>0.0159*</b>  | <b>0.059</b> |
| May                                     | 94         | 0.149        | 1.267        | 0.2052          | 0.029        |
| <b>Jun</b>                              | <b>218</b> | <b>0.346</b> | <b>2.956</b> | <b>0.0031**</b> | <b>0.070</b> |
| Jul                                     | 74         | 0.117        | 0.994        | 0.3201          | 0.028        |
| <b>Aug</b>                              | <b>108</b> | <b>0.171</b> | <b>1.457</b> | <b>0.1450</b>   | <b>0.033</b> |
| <b>Sep</b>                              | <b>222</b> | <b>0.352</b> | <b>3.010</b> | <b>0.0026**</b> | <b>0.061</b> |
| Oct                                     | 128        | 0.203        | 1.730        | 0.0837          | 0.034        |
| <b>Year</b>                             | <b>196</b> | <b>0.311</b> | <b>2.656</b> | <b>0.0079**</b> | <b>0.033</b> |
| <b>jez. Sławskie – Radzyń (II)</b>      |            |              |              |                 |              |
| <b>Nov</b>                              | <b>314</b> | <b>0.498</b> | <b>4.263</b> | <b>0.0000**</b> | <b>0.093</b> |
| <b>Dec</b>                              | <b>184</b> | <b>0.292</b> | <b>2.493</b> | <b>0.0127*</b>  | <b>0.039</b> |
| Jan                                     | 66         | 0.105        | 0.885        | 0.3760          | 0.007        |
| Feb                                     | 136        | 0.216        | 1.839        | 0.0659          | 0.041        |
| <b>Mar</b>                              | <b>182</b> | <b>0.289</b> | <b>2.465</b> | <b>0.0137*</b>  | <b>0.059</b> |
| <b>Apr</b>                              | <b>252</b> | <b>0.400</b> | <b>3.419</b> | <b>0.0006**</b> | <b>0.070</b> |
| May                                     | 56         | 0.089        | 0.749        | 0.4538          | 0.018        |
| <b>Jun</b>                              | <b>278</b> | <b>0.441</b> | <b>3.773</b> | <b>0.0002**</b> | <b>0.084</b> |

| Period                               | S    | Tau    | Z-Value | P-Value  | Sen's Slope |
|--------------------------------------|------|--------|---------|----------|-------------|
| Jul                                  | 268  | 0.425  | 3.637   | 0.0003** | 0.066       |
| Aug                                  | 314  | 0.498  | 4.263   | 0.0000** | 0.072       |
| Sep                                  | 326  | 0.517  | 4.427   | 0.0000** | 0.090       |
| Oct                                  | 208  | 0.330  | 2.820   | 0.0048** | 0.052       |
| Year                                 | 410  | 0.651  | 5.571   | 0.0000** | 0.058       |
| <b>jez. Powidzkie – Powidz (III)</b> |      |        |         |          |             |
| Nov                                  | 194  | 0.308  | 2.629   | 0.0086** | 0.033       |
| Dec                                  | 28   | 0.044  | 0.368   | 0.7130   | 0.008       |
| Jan                                  | -110 | -0.175 | -1.485  | 0.1376   | -0.027      |
| Feb                                  | -92  | -0.146 | -1.240  | 0.2152   | -0.026      |
| Mar                                  | -10  | -0.016 | -0.123  | 0.9024   | -0.004      |
| Apr                                  | 68   | 0.108  | 0.913   | 0.3615   | 0.023       |
| May                                  | -56  | -0.089 | -0.749  | 0.4538   | -0.021      |
| Jun                                  | 136  | 0.216  | 1.839   | 0.0659   | 0.053       |
| Jul                                  | 76   | 0.121  | 1.022   | 0.3070   | 0.030       |
| Aug                                  | 154  | 0.244  | 2.084   | 0.0372*  | 0.041       |
| Sep                                  | 164  | 0.260  | 2.220   | 0.0264*  | 0.050       |
| Oct                                  | 54   | 0.086  | 0.722   | 0.4704   | 0.015       |
| Year                                 | 84   | 0.133  | 1.131   | 0.2583   | 0.014       |

\*—significant at a level of 0.05; \*\*—significant at a level of 0.01.

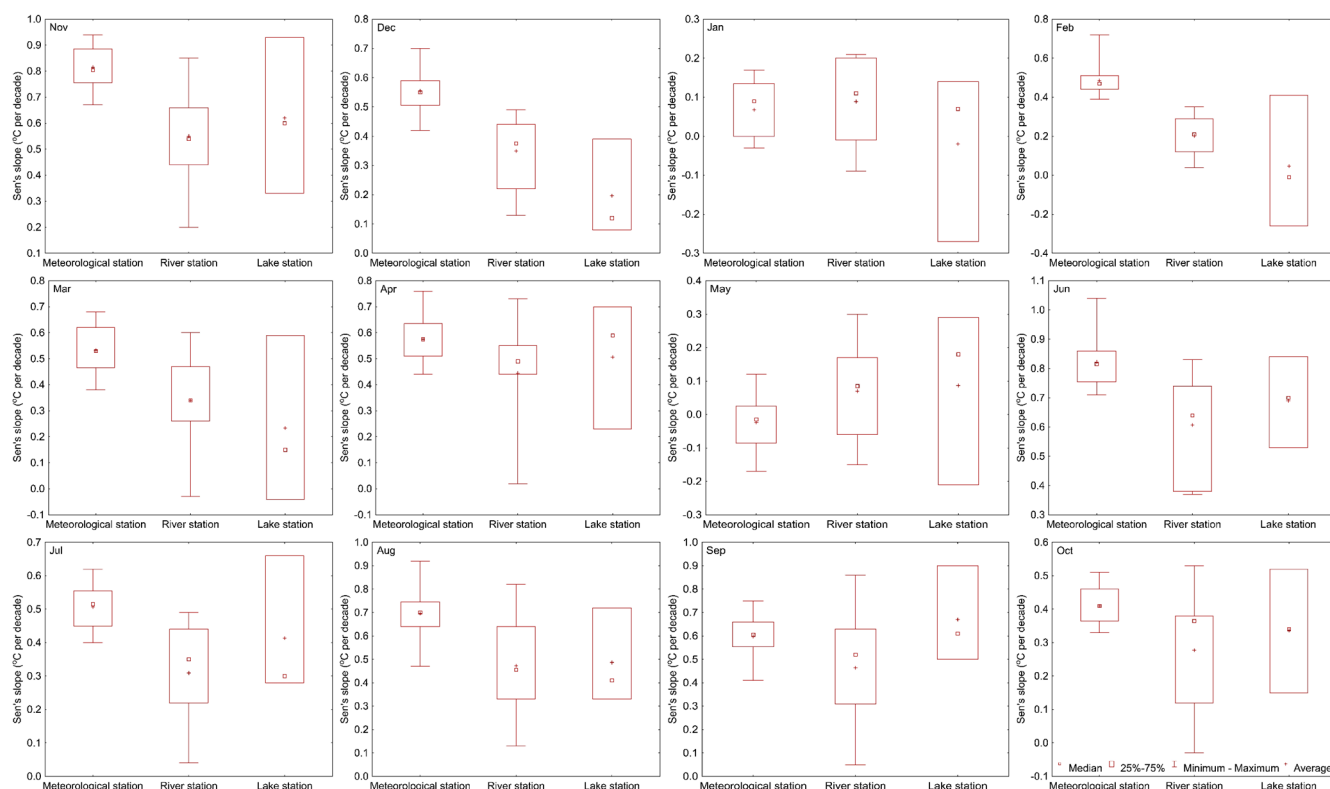

Figure S1. The ranges of mean monthly changes in air and water temperatures in rivers and lakes.
